# Supplementary material for: First crystallographic signature of an acyclic peptide nanorod: molecular mechanism of nanorod formation by a self-assembled tetrapeptideElectronic supplementary information (ESI) available: selected backbone torsion angles for 1, Figure showing packing of 1, and a space-filling model of higher-ordered supramolecular helical assembly of 1. See http://www.rsc.org/suppdata/cc/b3/b302472p/
Source: Royal Society of Chemistry journal article supplement (doi:10.1039/b302472p), 2003-01-01
Supplement: b302472p.doc [file b302472p.doc]

# Supplementary data

Selected backbone torsion angles (°) for peptide **1**

|  | | | |
| --- | --- | --- | --- |
| O16-C15-N14-C13 | -169.0(4) 0 | C9-N8-C7-C6 | -66.4(6) 3 |
| C15-N14-C13-C12 | -55.5(6) 1 | N8-C7-C6-N5 | -21.7(6) 3 |
| N14-C13-C12-N11 | -40.1(7) 1 | C7-C6-N5-C4 | -178.6(5) 3 |
| C13-C12-N11-C10 | -172.9(5) 1 | C6-N5-C4-C3 | -81.1(6) 4 |
| C12-N11-C10-C9 | -58.1(7) 2 | N5-C4-C3-C2 | -65.3(5) 1 |
| N11-C10-C9-N8 | -28.7(6) 2 | C4-C3-C2-O1 | -35.8(6) 4 |
| C10-C9-N8-C7 | -171.7(4) 2 |  |  |
|  |  |  |  |
|  |  |  |  |
|  |  |  |  |
|  |  |  |  |
|  |  |  |  |
|  | | | |

**
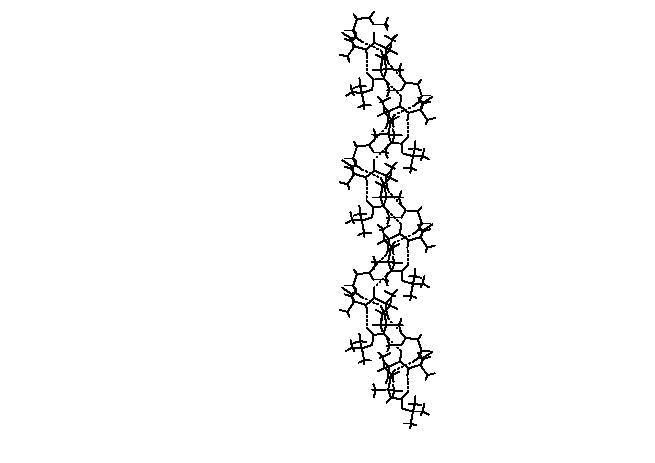
**

Figure 1: The packing of the peptide **1** showing the intermolecular hydrogen-bonded supramolecular helix along the b axis. Hydrogen bonds are shown as dotted lines.


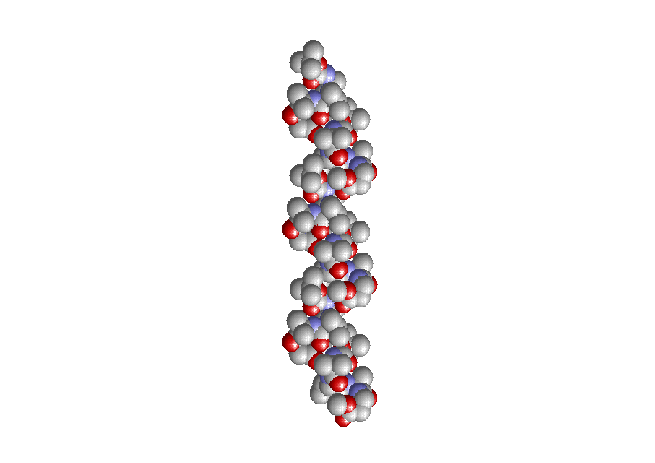


Figure 3: Space-filling model of a supramolecular helical array showing the staking of subunits maintaining the proper registry, generating a nano-structure of an average diameter of 10Å as determined by single X-ray crystallographic studies. Nitrogen atoms are blue, oxygen atoms are red and carbon atoms are gray. Hydrogen atoms are omitted for clarity.
